# Supplementary material for: Strategies to Prevent Early and Late-Onset Group B Streptococcal Infection via Interventions in Pregnancy
Source: MDPI journal article supplement (doi:10.3390/pathogens12020229), 2023-02-01
Supplement: s1 [file s1]

**Supplemental Table S1: Detailed adverse outcomes of GBS Vaccines investigated in clinical trials on pregnant or non-pregnant populations using different databases**

| Vaccine Formulation                     | Registry Number | Country | Clinical Phase (Status) | Study Duration | Age group, years | Gestation Weeks | Total Study Population | Population, N (Groups)                                                                                                                  | Local reactions                                                                                                                                                                                                                                                                                                                                                                                                                                             | Systemic events                                                                                                                                                                                  | Reference               |
|-----------------------------------------|-----------------|---------|-------------------------|----------------|------------------|-----------------|------------------------|-----------------------------------------------------------------------------------------------------------------------------------------|-------------------------------------------------------------------------------------------------------------------------------------------------------------------------------------------------------------------------------------------------------------------------------------------------------------------------------------------------------------------------------------------------------------------------------------------------------------|--------------------------------------------------------------------------------------------------------------------------------------------------------------------------------------------------|-------------------------|
| Monovalent GBS III-TT conjugate vaccine | N.R.            | Canada  | N.R.                    | NR             | 18-40            | Non-pregnant    | 100                    | Vaccine group:<br>III-TT 58 µg: 30<br>III-TT 14.5 mg: 15<br>III-TT 3.6 mg: 15<br>III CPS, 50 mg: 30<br>Placebo group:<br>Saline, NA: 10 | Vaccine group:<br>III-TT, 58µg group:<br>Pain- sore with movement: 9/30 (30%)<br>Redness and swelling- sore with movement: 3/30(10%)<br>14.5µg group:<br>Pain- sore with movement: 5/15 (33%)<br>3.6µg group:<br>Pain- sore with movement: 1/15 (7%)<br>III CPS, 50µg group:<br>Pain- sore with movement: 4/30 (13%)<br>Redness and swelling- sore with movement: 1/30 (3%)<br>Placebo group:<br>Saline, N.A group:<br>Pain- sore with movement: 3/10 (30%) | N.R.                                                                                                                                                                                             | Kasper et al, 1996 [53] |
| Monovalent GBS III-TT conjugate vaccine | N.R.            | USA     | Phase 1 (Completed)     | NR             | 18-45            | >37             | 30                     | Vaccine group: 20<br>Placebo group: 10                                                                                                  | Vaccine group:<br>Injection site pain- mild: 11/18 (65%)<br>moderate: 1/18 (5%)<br>Redness at the injection site: 2/18 (10%)<br>Placebo group:<br>Injection site pain, mild or moderate: 5/12 (40%)<br>Redness at the injection site: 0/12 (0%)                                                                                                                                                                                                             | N.R.                                                                                                                                                                                             | Baker et al, 2003a [54] |
| Bivalent GBS conjugate                  | N.R.            | USA     | Phase 2 (Completed)     | NR             | 18-45            | Non-pregnant    | 75                     | Vaccine group:<br>GBS II-TT (3.6 mg of CPS): 25<br>GBS III-TT (12.5 mg of CPS): 25<br>GBS II-TT/III-TT vaccine: 25                      | Monovalent GBS-II-TT//IIITT Group:<br>Mild redness or swelling at the injection site: 2/ 25(8%)<br>Bivalent GBS-II-TT/III-TT Group:<br>Mild redness or swelling at the injection site: 2/ 25(8%)                                                                                                                                                                                                                                                            | Monovalent GBS-II-TT//IIITT Group: No serious adverse effects were observed.<br>Mild systemic symptoms associated with low-grade fever: 2/75 (2.6%) in males<br>Bivalent GBS-II-TT/III-TT Group: | Baker et al, 2003b [56] |

|                                    |             |                            |                          |               |       |       |     |                                                                     |                                                                                                                                                                                                                                 |                                                                                                                                                                                                                             |
|------------------------------------|-------------|----------------------------|--------------------------|---------------|-------|-------|-----|---------------------------------------------------------------------|---------------------------------------------------------------------------------------------------------------------------------------------------------------------------------------------------------------------------------|-----------------------------------------------------------------------------------------------------------------------------------------------------------------------------------------------------------------------------|
|                                    |             |                            |                          |               |       |       |     | Placebo group:<br>No placebo group                                  | Single temperature<br>elevation to 100.4F 17 h<br>after receiving the bivalent<br>vaccine 1/75 (1.3%) in<br>males                                                                                                               |                                                                                                                                                                                                                             |
| Trivalent GBS<br>conjugate vaccine | NCT01193920 | South<br>Africa            | Phase1b/2<br>(Completed) | 2010-<br>2011 | 18-40 | 28-35 | 380 | Vaccine group<br>(Non-pregnant):<br>GBS vaccine 20 µg:<br>40        | Vaccine group (Non-pregnant):<br>GBS vaccine 20 µg group:<br>Injection site pain: 39/40 (97.50%)<br>Swelling: 14/40 (35.00%)<br>Placebo group: (Non-pregnant):<br>Injection site pain:15/20 (75.00%)<br>Swelling: 2/20 (10.00%) | Vaccine group (Non-pregnant):<br>Chills: 15/40 (37.50%)<br>Fatigue: 29/40 (72.50%)<br>Pyrexia: 6/40 (15.00%)<br>Placebo group: (Non-pregnant):<br>Chills: 6/20 (30.00%)<br>Fatigue: 12/20 (60.00%)<br>Pyrexia: 0/20 (0.00%) |
|                                    |             |                            |                          |               |       |       |     | Placebo group:<br>(Non-pregnant):<br>Placebo: 20                    | Vaccine group (Pregnant)<br>GBS vaccine 0-5 mg group<br>Injection site pain: 28/80 (35.00%)<br>Swelling: 2/80 (2.50%)                                                                                                           | Vaccine group (Pregnant)<br>GBS vaccine 0-5 mg group:<br>Chills: 16/80 (20.00%)<br>Fatigue: 39/80 (48.75%)<br>Pyrexia: 5/80 (6.25%)                                                                                         |
|                                    |             |                            |                          |               |       |       |     | Vaccine group<br>(Pregnant)<br>GBS vaccine 0-5<br>mg : 80           | GBS vaccine 2-5 µg group<br>Injection site pain: 25/80 (31.25%)<br>Swelling: 5/80 (6.25%)                                                                                                                                       | GBS vaccine 2-5 µg group<br>Chills: 7/80 (8.75%)<br>Fatigue: 34/80 (42.50%)<br>Pyrexia: 1/80 (1.25%)<br>Death: 1/80 (1.25%)                                                                                                 |
|                                    |             |                            |                          |               |       |       |     | GBS vaccine 2-5 µg<br>: 80                                          | GBS vaccine 5-0 µg group<br>Injection site pain: 26/80 (32.50%)<br>Swelling: 5/80 (6.25%)                                                                                                                                       | GBS vaccine 5-0 µg group<br>Chills: 8/80 (10.00%)<br>Fatigue:43/80 (53.75%)<br>Pyrexia: 4/80 (5.00%)                                                                                                                        |
|                                    |             |                            |                          |               |       |       |     | GBS vaccine 5-0<br>µg: 80                                           | Placebo Group (Pregnant) group<br>Injection site pain: 24/80 (30.00%)<br>Swelling: 1/80 (1.25%)                                                                                                                                 | Placebo Group (Pregnant)<br>Chills: 9/80 (11.25%)<br>Fatigue:37/80 (46.25%)<br>Pyrexia: 2/80 (2.50%)                                                                                                                        |
|                                    |             |                            |                          |               |       |       |     | Placebo Group<br>(Pregnant)<br>Placebo: 80                          |                                                                                                                                                                                                                                 |                                                                                                                                                                                                                             |
|                                    |             |                            |                          |               |       |       |     |                                                                     |                                                                                                                                                                                                                                 |                                                                                                                                                                                                                             |
|                                    |             |                            |                          |               |       |       |     |                                                                     |                                                                                                                                                                                                                                 |                                                                                                                                                                                                                             |
|                                    |             |                            |                          |               |       |       |     |                                                                     |                                                                                                                                                                                                                                 |                                                                                                                                                                                                                             |
|                                    |             |                            |                          |               |       |       |     |                                                                     |                                                                                                                                                                                                                                 |                                                                                                                                                                                                                             |
|                                    |             |                            |                          |               |       |       |     |                                                                     |                                                                                                                                                                                                                                 |                                                                                                                                                                                                                             |
|                                    |             |                            |                          |               |       |       |     |                                                                     |                                                                                                                                                                                                                                 |                                                                                                                                                                                                                             |
|                                    |             |                            |                          |               |       |       |     |                                                                     |                                                                                                                                                                                                                                 |                                                                                                                                                                                                                             |
| Trivalent GBS<br>conjugate vaccine | NCT01412801 | Malawi,<br>South<br>Africa | Phase 2<br>(Completed)   | 2011-<br>2012 | 18-40 | 24-35 | 270 | GBS vaccine in:<br>HIV-infected, low<br>CD4 cell count<br>group: 91 | GBS vaccine in:<br>HIV-infected, low CD4 cell count >50 to<br>≤350 cells per µl- Pain and swelling at an<br>injection site:16/87 (18%)                                                                                          | GBS vaccine in:<br>HIV-infected, low CD4 cell<br>count >50 to ≤350 cells per<br>µL- any systemic reactions                                                                                                                  |
|                                    |             |                            |                          |               |       |       |     | HIV-infected, high<br>CD4 cell count                                | HIV-infected, high CD4 cell count >350<br>cells per µL- Pain and swelling at an                                                                                                                                                 | (chills/ nausea/ malaise/<br>myalgia/ arthralgia/                                                                                                                                                                           |
|                                    |             |                            |                          |               |       |       |     |                                                                     |                                                                                                                                                                                                                                 |                                                                                                                                                                                                                             |
| Heyderman<br>et al, 2016<br>[59]   |             |                            |                          |               |       |       |     |                                                                     |                                                                                                                                                                                                                                 |                                                                                                                                                                                                                             |

|                                            |                                                                  |                        |                        |               |       |       |                                        |                                                                                                                                                                                                                              |                                                                                                                                                                                                                                                                                                                            |                                                                                                                                                                                                                                                      |                                                                                                                                                                                                                                                                                                                                                                                                      |  |
|--------------------------------------------|------------------------------------------------------------------|------------------------|------------------------|---------------|-------|-------|----------------------------------------|------------------------------------------------------------------------------------------------------------------------------------------------------------------------------------------------------------------------------|----------------------------------------------------------------------------------------------------------------------------------------------------------------------------------------------------------------------------------------------------------------------------------------------------------------------------|------------------------------------------------------------------------------------------------------------------------------------------------------------------------------------------------------------------------------------------------------|------------------------------------------------------------------------------------------------------------------------------------------------------------------------------------------------------------------------------------------------------------------------------------------------------------------------------------------------------------------------------------------------------|--|
|                                            |                                                                  |                        |                        |               |       |       |                                        |                                                                                                                                                                                                                              | group: 89<br>HIV-uninfected<br>group: 90                                                                                                                                                                                                                                                                                   | injection site: 26/88 (30%)<br>HIV-uninfected- Pain and swelling at an<br>injection site: 35/90 (39%)                                                                                                                                                | headache/ fatigue/ rash/<br>fever) : 35/87 (40%)<br>HIV-infected, high CD4<br>cell count >350 cells per<br>µL- any systemic reactions<br>(chills/ nausea/ malaise/<br>myalgia/ arthralgia/<br>headache/ fatigue/ rash/<br>fever) : 48/88 (55%)<br>HIV-uninfected- any<br>systemic reactions (chills/<br>nausea/ malaise/ myalgia/<br>arthralgia/ headache/<br>fatigue/ rash/ fever) : 53/90<br>(59%) |  |
| <b>Trivalent GBS<br/>conjugate vaccine</b> | NCT01446289/Belgium,<br>EUCTR2010- Canada,<br>020840-36-BE Italy | Phase 2<br>(Completed) | 2011-<br>2013          | 18-40         | 24-35 | 86    | Vaccine group: 49<br>Placebo group: 34 | Vaccine group:<br>Pain: 35/49 (71%)<br>Swelling: 4/49 (8.1%)<br>Ecchymosis: 2/49 (4%)<br>Erythema: 6/49 (12%)<br>Placebo group:<br>Pain: 12 /34 (35%)<br>Swelling: 0/34 (0%)<br>Ecchymosis: 0/34 (0%)<br>Erythema: 0/34 (0%) | Vaccine group:<br>Chills: 4/49 (8%)<br>Malaise:14/49 (28%)<br>Myalgia:27/49 (55%)<br>Arthralgia: 4/49 (8%)<br>Headache: 16/49 (32%)<br>Fatigue: 31/49 (63%)<br>Placebo group:<br>Chills: 3/34 (8%)<br>Malaise: 9/34 (26%)<br>Myalgia: 3/34 (8%)<br>Arthralgia: 9/34 (26%)<br>Headache: 21/34 (61%)<br>Fatigue: 26/34 (76%) | Donders et<br>al, 2016 [60]                                                                                                                                                                                                                          |                                                                                                                                                                                                                                                                                                                                                                                                      |  |
| <b>Trivalent GBS<br/>conjugate vaccine</b> | NCT02046148                                                      | USA                    | Phase 2<br>(Completed) | 2014-<br>2015 | 18-40 | 24-35 | 75                                     | Vaccine group: 49<br>Placebo group: 26                                                                                                                                                                                       | Pain at injection site including redness:<br>24/49 (50%)<br>Placebo group:<br>Pain at injection site including redness:<br>8/26 (31%)                                                                                                                                                                                      | Vaccine group:<br>Fatigue: 18/49 (38%)<br>Nausea: 7/49 (15%)<br>Headache: 6/49 (13%)<br>Loss of appetite:6/49 (13%)<br>Myalgia: 2/49 (4%)<br>Arthralgia: 2/49 (4%)<br>Chills: 1/49 (2%)<br>Rash: 1/49 (2%)<br>Urticaria: 1/49 (2%)<br>Placebo group: | Swamy et al,<br>2020[62]                                                                                                                                                                                                                                                                                                                                                                             |  |

|                                             |             |     |                          |               |       |                  |     |                                                                                                                                                                                                                                            |                                                                                                                                                                                                                                 |                                                                                                                                      |                                                                                                                                                                       |
|---------------------------------------------|-------------|-----|--------------------------|---------------|-------|------------------|-----|--------------------------------------------------------------------------------------------------------------------------------------------------------------------------------------------------------------------------------------------|---------------------------------------------------------------------------------------------------------------------------------------------------------------------------------------------------------------------------------|--------------------------------------------------------------------------------------------------------------------------------------|-----------------------------------------------------------------------------------------------------------------------------------------------------------------------|
|                                             |             |     |                          |               |       |                  |     |                                                                                                                                                                                                                                            |                                                                                                                                                                                                                                 |                                                                                                                                      | Fatigue: 6/26 (23%)<br>Nausea: 3/26 (12%)<br>Headache: 3/26 (12%)<br>Loss of appetite: 2/26 (8%)<br>Myalgia: 2/26 (8%)<br>Arthralgia: 25/26 (8%)<br>Chills: 1/26 (4%) |
| <b>Quadrivalent GBS</b>                     | N.R.        | USA | Phase 1<br>(Completed)   | NR            | 18-40 | Non-<br>pregnant | 40  | Vaccine group: 40<br>Placebo group:<br>Absence of placebo<br>group                                                                                                                                                                         | Vaccine group: Pain, tenderness, and<br>erythema: 6/40 (15%)<br>Placebo group: No placebo group                                                                                                                                 | Vaccine group: nausea,<br>malaise, myalgia, or<br>headache: 6 (15%)<br>Placebo group: No placebo<br>group                            | Kotloff et<br>al, 1996 [64]                                                                                                                                           |
| <b>Hexavalent GBS<br/>conjugate vaccine</b> | NCT03170609 | USA | Phase 1/2<br>(Completed) | 2017-<br>2018 | 18-49 | Non-<br>pregnant | 365 | Vaccine group:<br>GBS6 5 µg with<br>AlPO4: 52<br>GBS6 5 µg without<br>AlPO4: 52<br>GBS6 10 µg with<br>AlPO4: 52<br>GBS6 10 µg<br>without AlPO4: 52<br>GBS6 20 µg with<br>AlPO4: 52<br>GBS6 20 µg<br>without AlPO4: 52<br>Placebo group: 52 | Vaccine group: GBS6 5 µg without AlPO4<br>group: pain at the injection site: 13/52<br>(25%)<br>GBS6 20 µg with AlPO4 group: Pain at an<br>injection site: 28 (54%)<br>Placebo group: No severe local reactions<br>were reported | Vaccine group: fatigue or<br>tiredness and headache:<br>1/52(2%)<br>Placebo group: fatigue or<br>tiredness and headache:<br>1/52(2%) | Absalon et<br>al, 2021 [65]                                                                                                                                           |

NR: Not reported

**Supplemental Table S2: Additional reports on GBS Vaccines investigated in clinical trials on pregnant or non-pregnant populations using different databases**

| Vaccine Formulation             | Registry Number | Country                     | Clinical Phase (Status) | Study Duration | Age group, years | Gestation Weeks | Total Study Population | Population, N (Groups)                                                                                                                                                         | Time point for immunogenicity assessment | Immunogenicity results: Mean GMC (95% CI)                                                                                                                                                                                                                                                                                                                                                                                                                                                                                                                                        | Reference                |
|---------------------------------|-----------------|-----------------------------|-------------------------|----------------|------------------|-----------------|------------------------|--------------------------------------------------------------------------------------------------------------------------------------------------------------------------------|------------------------------------------|----------------------------------------------------------------------------------------------------------------------------------------------------------------------------------------------------------------------------------------------------------------------------------------------------------------------------------------------------------------------------------------------------------------------------------------------------------------------------------------------------------------------------------------------------------------------------------|--------------------------|
| Trivalent GBS conjugate vaccine | NCT01193920     | South Africa                | Phase 1b/2 (Completed)  | 2010-2012      | 0                | N.A             | 317                    | Vaccine group (After birth):<br>GBS serotype Ia<br>GBS 0.5 mg: 75<br>GBS 2.5 mg: 76<br>GBS 5.0 mg: 69<br>GBS serotype Ib<br>GBS 0.5 mg: 71<br>GBS 2.5 mg: 71<br>GBS 5.0 mg: 66 | At delivery                              | Infants:<br>Vaccine group: GBS serotype Ia: 6.66 (4.03–11.0)<br>serotype Ib: 1.15 (.68–1.95)<br>serotype III: 2.11 (1.26–3.54)                                                                                                                                                                                                                                                                                                                                                                                                                                                   | Madhi et al, 2017 [57]   |
|                                 |                 |                             |                         |                |                  |                 |                        | Placebo group (After birth):<br>GBS serotype Ia<br>Placebo: 73<br>GBS serotype Ib<br>Placebo: 62                                                                               |                                          | Placebo group<br>GBS serotype Ia: 0.49 (.34–.71)<br>serotype Ib: 0.21 (.14–.32)<br>serotype III: 0.29 (.19–.43)                                                                                                                                                                                                                                                                                                                                                                                                                                                                  |                          |
| Trivalent GBS conjugate vaccine | NCT01446289     | Italy, Belgium, Canada, USA | Phase 2 (Completed)     | 2011-2013      | 18-40            | 24-35           | 86                     | Vaccine group: 51<br>Placebo group: 35                                                                                                                                         | At delivery                              | Vaccine group:<br>Serotype Ia- no. of OPKA $\geq 30$ : 32 (97%)<br>ELISA GMC ( $\mu\text{g/mL}$ ): 3.3<br>Serotype Ib- no. of OPKA $\geq 30$ : 20 (61%)<br>ELISA GMC ( $\mu\text{g/mL}$ ): 3.6<br>Serotype III- no. of OPKA $\geq 30$ : 29 (88%)<br>ELISA GMC ( $\mu\text{g/mL}$ ): 2.9<br>Placebo group:<br>Serotype Ia- no. of OPKA $\geq 30$ : 12 (55%)<br>ELISA GMC ( $\mu\text{g/mL}$ ): 0.5<br>Serotype Ib- no. of OPKA $\geq 30$ : 3 (14%)<br>ELISA GMC ( $\mu\text{g/mL}$ ): 0.1<br>Serotype III- no. of OPKA $\geq 30$ : 9 (41%)<br>ELISA GMC ( $\mu\text{g/mL}$ ): 0.1 | Fabrini et al, 2018 [61] |

**Footnote:**

Clinical trial registries maintained by WHO, US National Library of Medicine's Clinical Trial database, EU Clinical Trials Register, Health Canada's Clinical trial search database, Chinese Clinical Trial Registry, BMC's ISRCTN registry, Clinical Trial Registry-India for GBS vaccine trials in pregnant women studying prevention of GBS infections in their infants.

GBS: *Group B Streptococcus*; SAE: Serious adverse events, AE: Adverse events, CPS: capsular polysaccharide, HIV: Human immunodeficiency virus, N.R: not reported, OPKA: opsonophagocytic bacterial killing assay, ELISA: The enzyme-linked immunosorbent assay, GMC: geometric mean concentration, sIgA: serotype-specific secretory immunoglobulin A, IgG: immunoglobulin G.
